# Supplementary material
Source: PubMed Central journal article supplement (PMC3063589)
Supplement: 1000097107_pnas.201000097SI.pdf [file 1000097107_pnas.201000097SI.pdf]

# Supporting Information

Claesson et al. 10.1073/pnas.1000097107

## SI Materials and Methods

**Subject Recruitment.** Subjects were clinically examined at either of two local hospitals that serve a population base of ~481,000 in the Cork city and county region. The subjects were defined as (i) community-dwelling (control healthy), (ii) attending an outpatient day hospital (out-patient), (iii) in short-term rehabilitation hospital care (Rehabilitation; under 6-wk stay), or (iv) in long-term institutionalized care (Long stay; more than 6 wk). The mean age of the subjects was 78 ( $\pm$  7) y, with a range of 65–96 y. A full-analysis proforma was also applied to all subjects returning after 3 mo to allow for the identification of changes in lifestyle or health status or major dietary changes during this time.

**Sequence-Based Microbiota Analysis and Phylogeny.** The 16S rRNA V4 amplicons were sequenced on a 454 Genome Sequencer FLX platform (Roche Diagnostics) according to 454 protocols. Raw sequencing reads were quality trimmed according to published recommendations (1) using a locally installed version of the Ribosomal Database Project (RDP) Pyrosequencing Pipeline (2) applying the following criteria: (i) exact matches to primer sequences and barcode tags, (ii) no ambiguous bases (Ns), and (iii) read-lengths no shorter than 150 bp. For large-scale assignments into the new Bergey bacterial taxonomy (3), we used the Naïve Bayesian Classifier (RDP classifier), which provides rapid taxonomic classifications from domain to genus of both partial and full-length rRNA gene sequences along with bootstrap-like confidence estimates (4). Our choice of 50% as confidence-value threshold was based on what was found suitable for V4 amplicons from the human gut environment (5). Trimmed sequences

with their classifications were imported into a MySQL database for efficient storage and advanced querying. Pyrosequencing reads were aligned using Infernal (6) and associated covariance models obtained from the Ribosomal Database Project Group. These were based on secondary structural information from full-length 16S rRNA genes sequences of 508 fully sequenced genomes and were further trimmed to encompass only the V4 region to increase alignment speeds.

**Statistical Analysis.** The average proportion of total reads assigned to the different phyla and genera was compared according to antibiotic use for the 161 baseline samples using the nonparametric Mann–Whitney test. Although the data are more suitable to the nonparametric methods, independent-sample *t* tests were also conducted in tandem with the Mann–Whitney tests and provided the same conclusions, unless indicated otherwise in *Results*.

The average UniFrac distances within the 26 individuals from time 0 to time 3 mo were compared with the average between individual UniFrac distances at both time 0 and time 3 mo using robust *t* tests to allow for dependence between observations. These comparisons were made for both the weighted and unweighted UniFrac distances.

The change in the proportion of reads assigned to the different phyla and genera from time 0 to time 3 mo was compared according to antibiotic use for the 26 subjects who provided samples at both time points using the nonparametric Mann–Whitney test. Again, independent sample *t* tests were also conducted in tandem and provided the same conclusions as the Mann–Whitney test, unless indicated otherwise in *Results*.

1. Huse SM, Huber JA, Morrison HG, Sogin ML, Welch DM (2007) Accuracy and quality of massively parallel DNA pyrosequencing. *Genome Biol* 8:R143.
2. Cole JR, et al. (2009) The Ribosomal Database Project: Improved alignments and new tools for rRNA analysis. *Nucleic Acids Res* 37:D141–D145.
3. Lilburn TG, Garrity GM (2004) Exploring prokaryotic taxonomy. *Int J Syst Evol Microbiol* 54:7–13.

4. Wang Q, Garrity GM, Tiedje JM, Cole JR (2007) Naïve Bayesian classifier for rapid assignment of rRNA sequences into the new bacterial taxonomy. *Appl Environ Microbiol* 73:5261–5267.
5. Claesson MJ, et al. (2009) Comparative analysis of pyrosequencing and a phylogenetic microarray for exploring microbial community structures in the human distal intestine. *PLoS ONE* 4:e6669.
6. Nawrocki EP, Eddy SR (2007) Query-dependent banding (QDB) for faster RNA similarity searches. *PLOS Comput Biol* 3:e56.

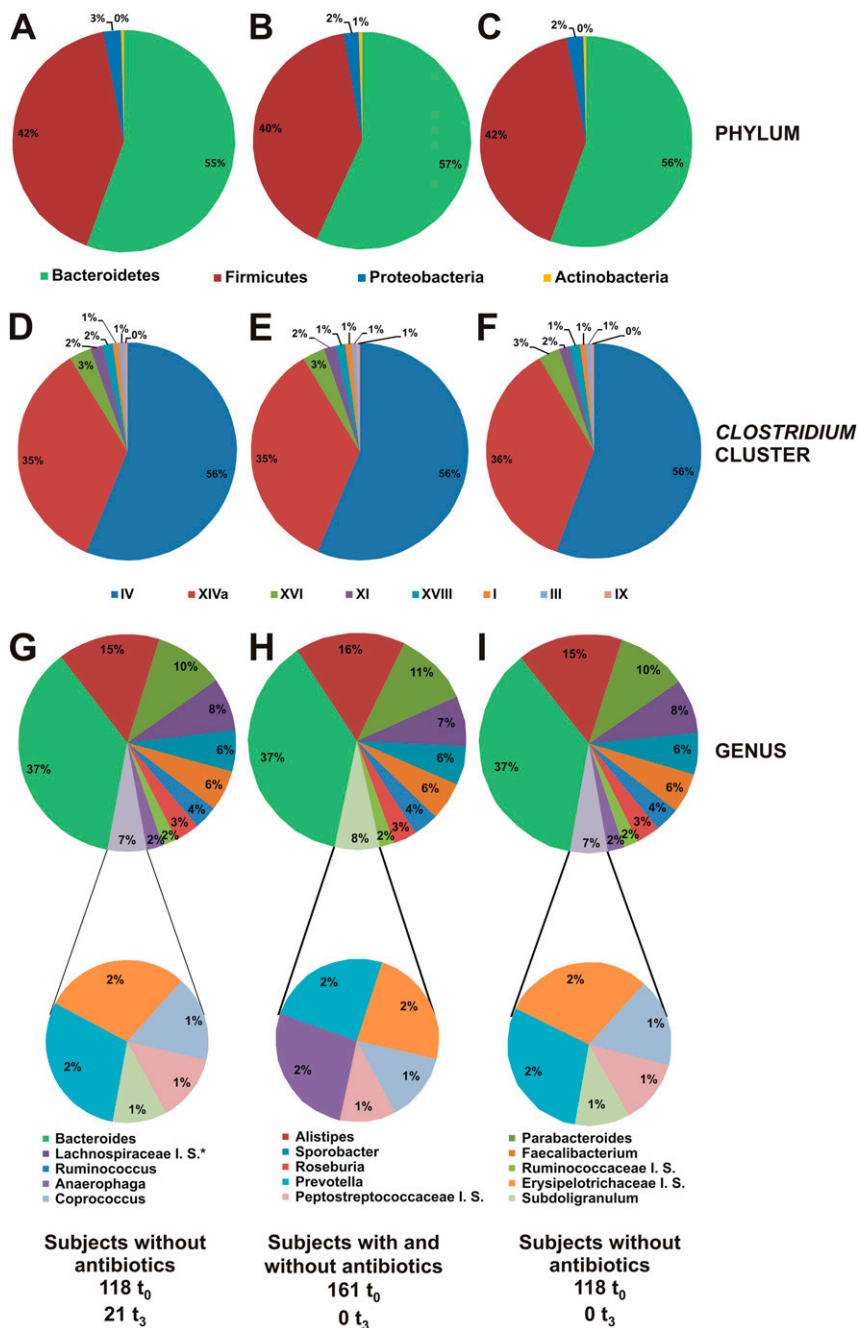

Fig. S1. Aggregate microbiota composition at the level of phylum, *Clostridium* cluster level, and genus, as indicated. Only the 4 most populated phyla (A–C), 8 most populated *Clostridium* clusters (D–F), and 15 largest genera (G–I) are shown.

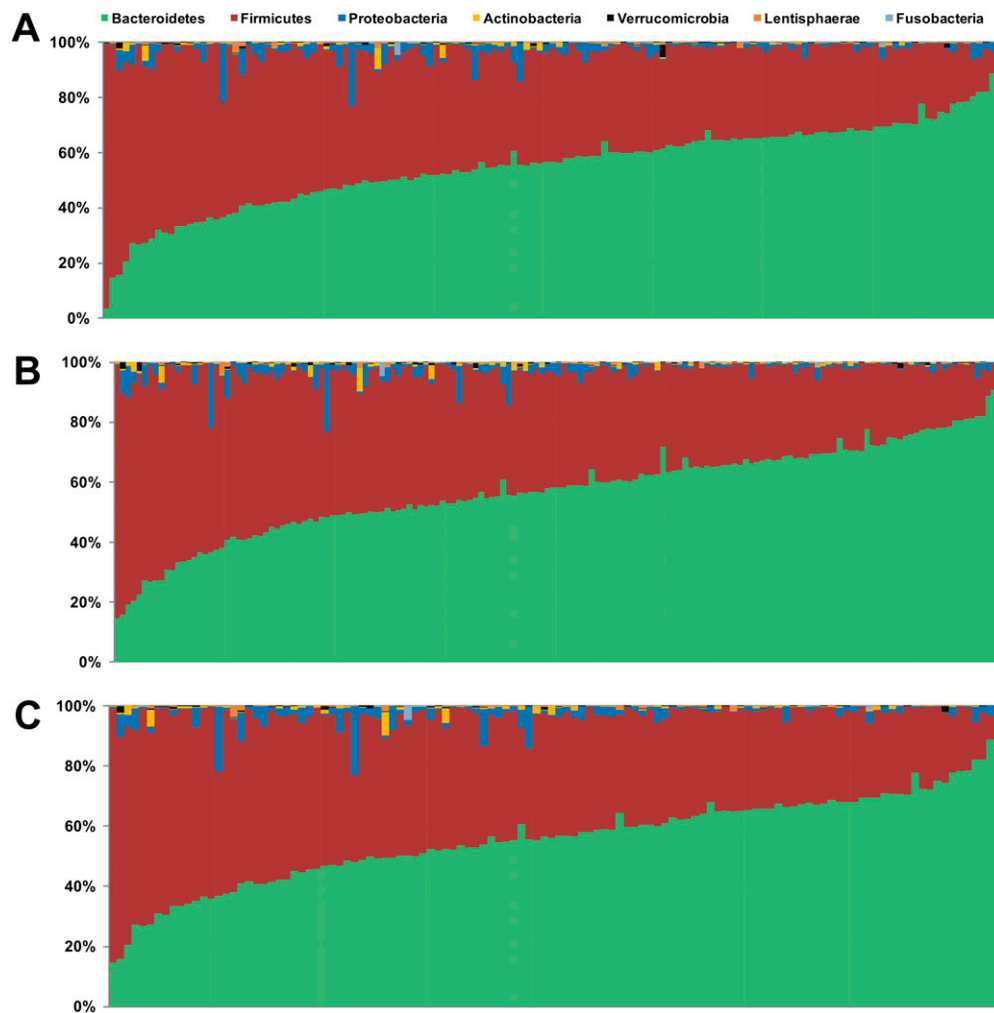

**Fig. S2.** Microbiota composition, at phylum level, in 139 (118 time 0 and 21 time 3 mo) fecal samples from elderly Irish subjects who had not been treated with antibiotics (A), 161 time-0 samples from subjects either treated or not treated with antibiotics (B), and 118 time-0 samples from subjects not treated with antibiotics (C). Only the seven largest phyla are shown. Samples were ordered by the proportion of all reads assigned to phylum *Bacteroidetes* to illustrate the dramatic interindividual variation.

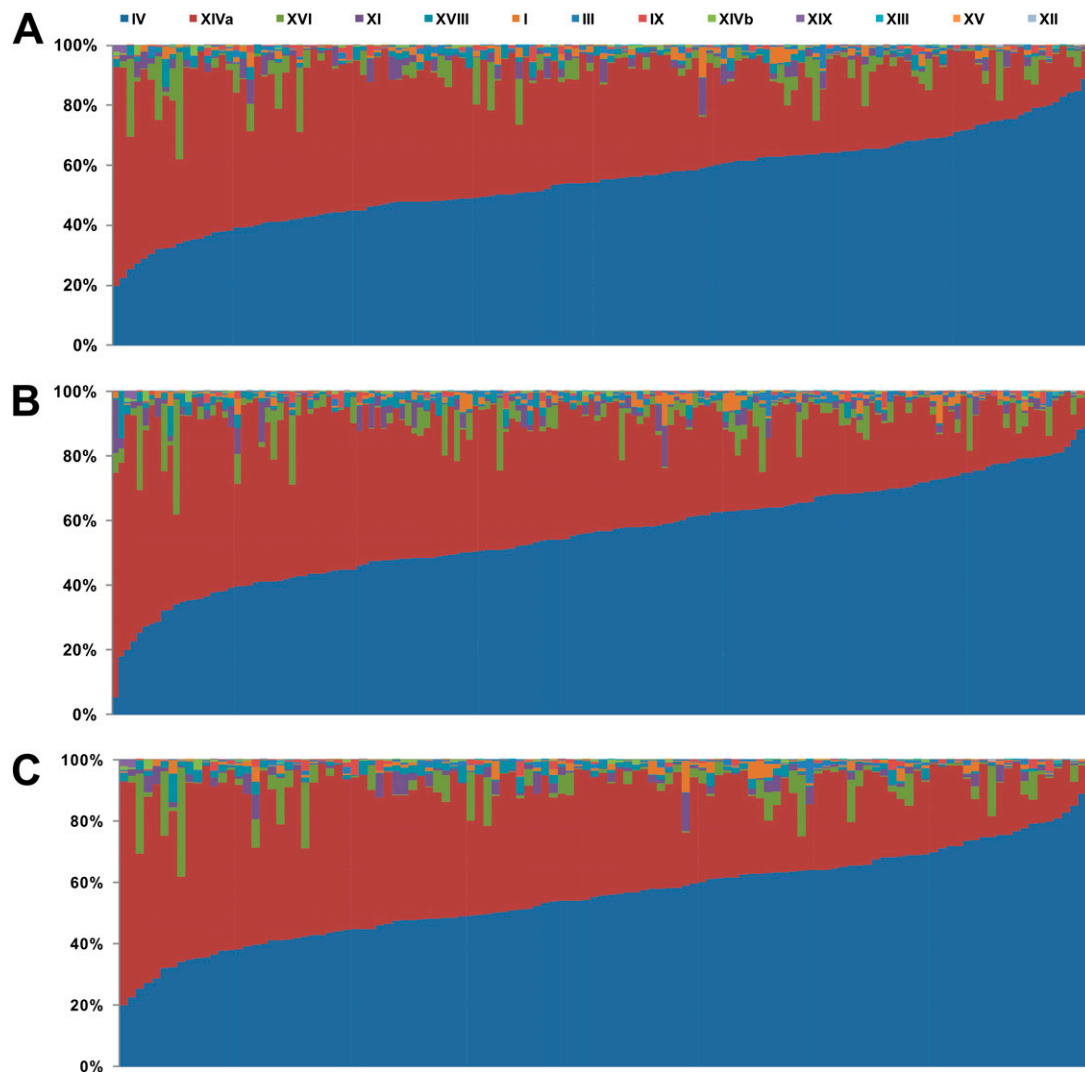

**Fig. S3.** Interindividual variation in the proportions of *Clostridium* clusters in 139 (118 time 0 and 21 time 3 mo) fecal samples from elderly Irish subjects who had not been treated with antibiotics (A), 161 time-0 samples from subjects either treated or not treated with antibiotics (B), and 118 time-0 samples from subjects not treated with antibiotics (C). Samples were ordered by the proportion of all reads assigned to *Clostridium* cluster IV to illustrate the dramatic interindividual variation.

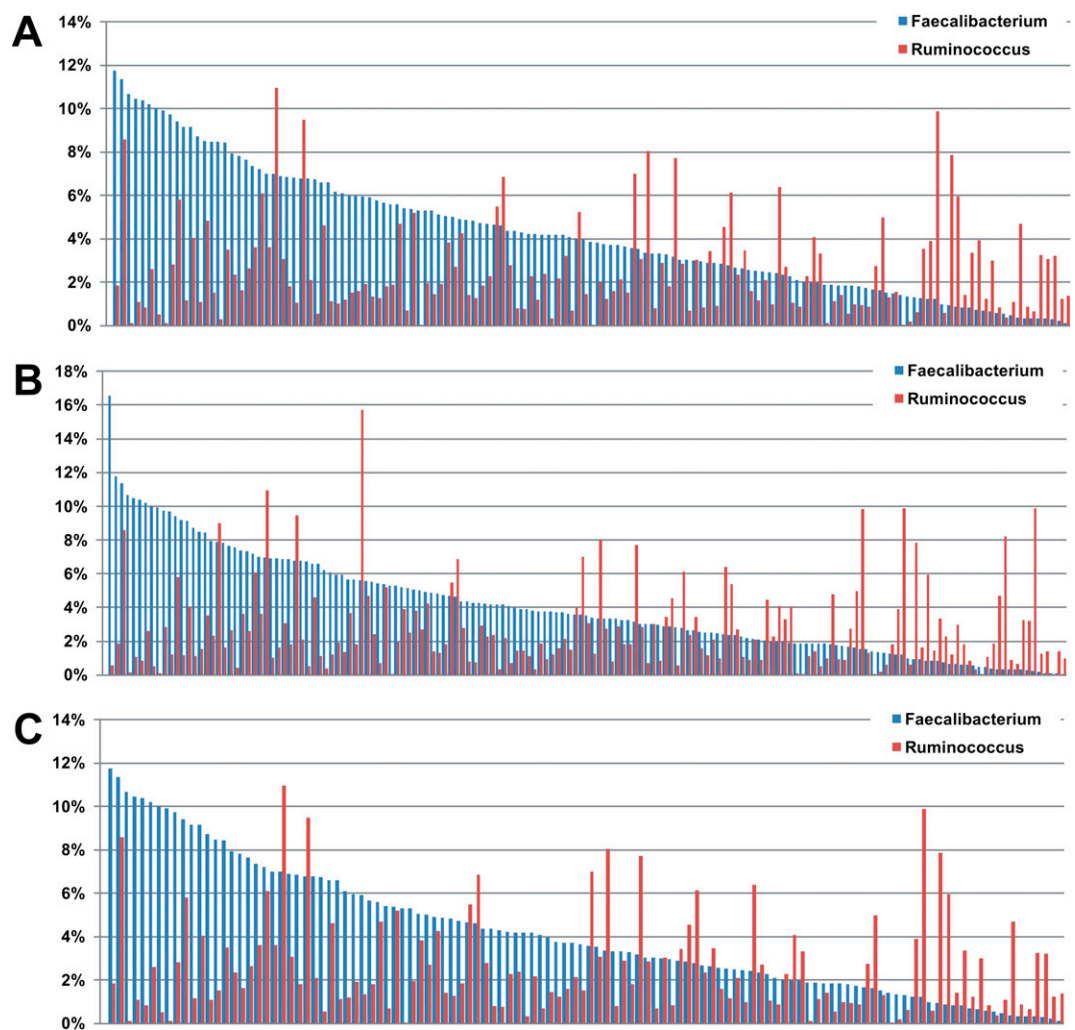

**Fig. S4.** Interindividual variation in the proportions of the genera *Faecalibacterium* and *Ruminococcus* in 139 (118 time 0 and 21 time 3 mo) fecal samples from elderly Irish subjects who had not been treated with antibiotics (*A*), 161 time-0 samples from subjects either treated or not treated with antibiotics (*B*), and 118 time-0 samples from subjects not treated with antibiotics (*C*). Samples are ordered by the proportion of all reads assigned to *Faecalibacterium* to illustrate the dramatic interindividual variation.

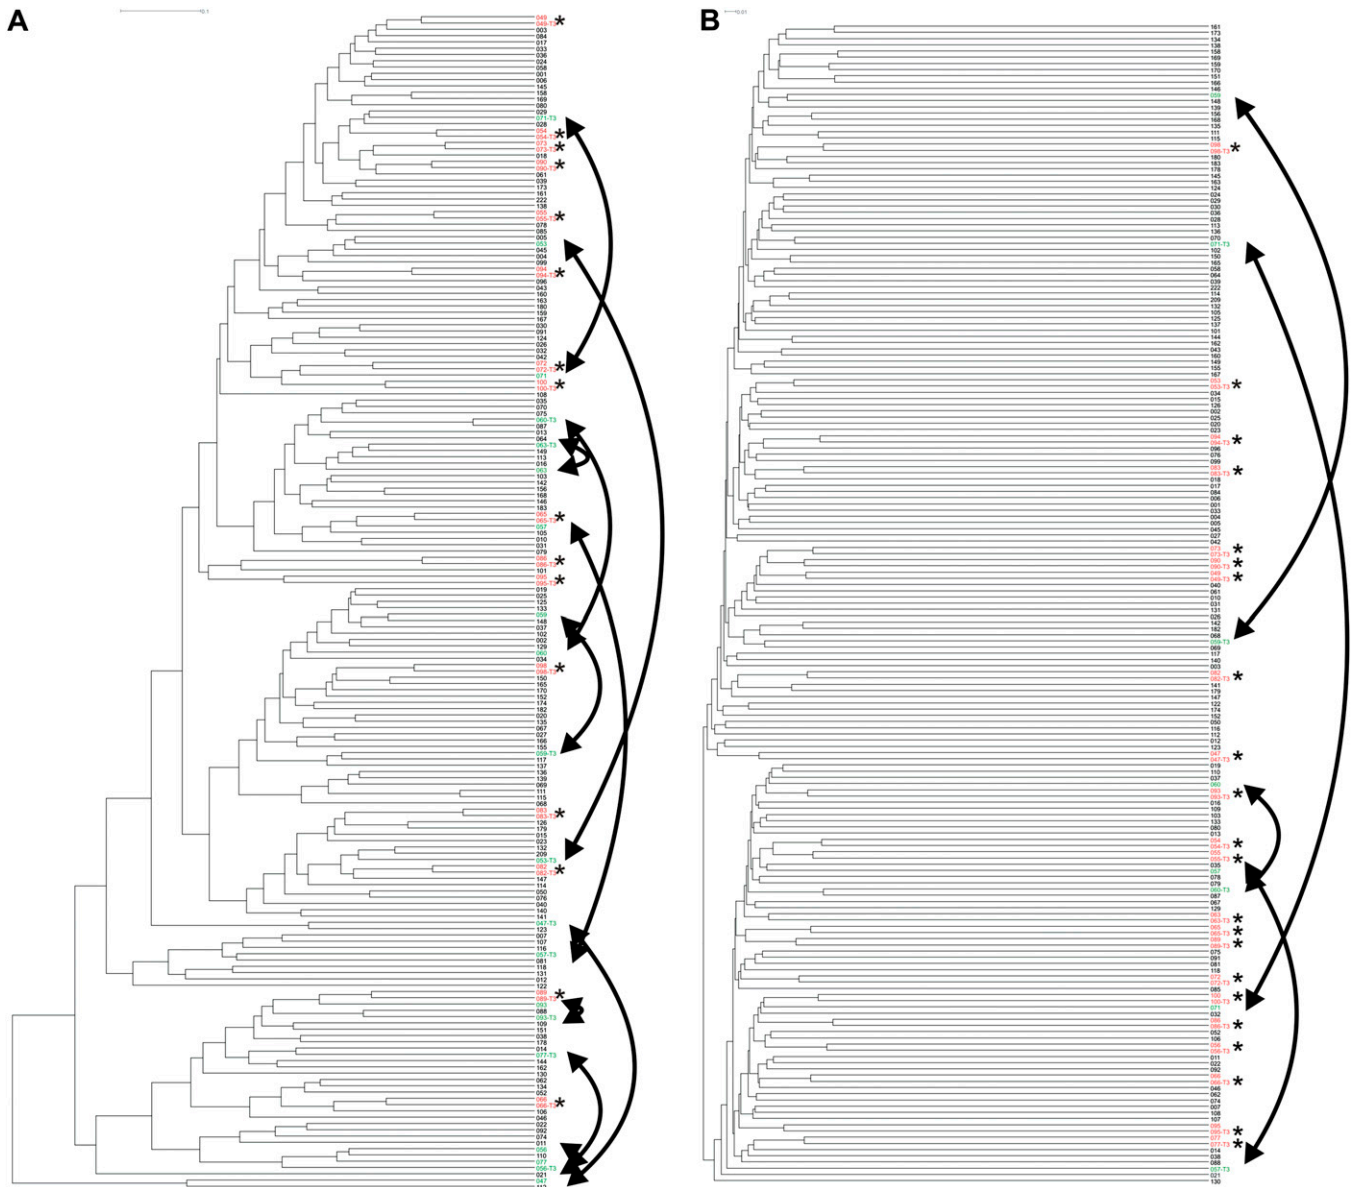

**Fig. S5.** Weighted (**A**) and unweighted (**B**) UniFrac tree of 161 time-0 fecal microbiota composition datasets and 26 time 3-mo datasets; paired samples that colocalize in the tree are highlighted in red and with asterisks, and unpaired samples are in green and with arrows. Scale bar indicates a weighted UniFrac distance of 0.1 and 0.01 for weighted and unweighted, respectively.

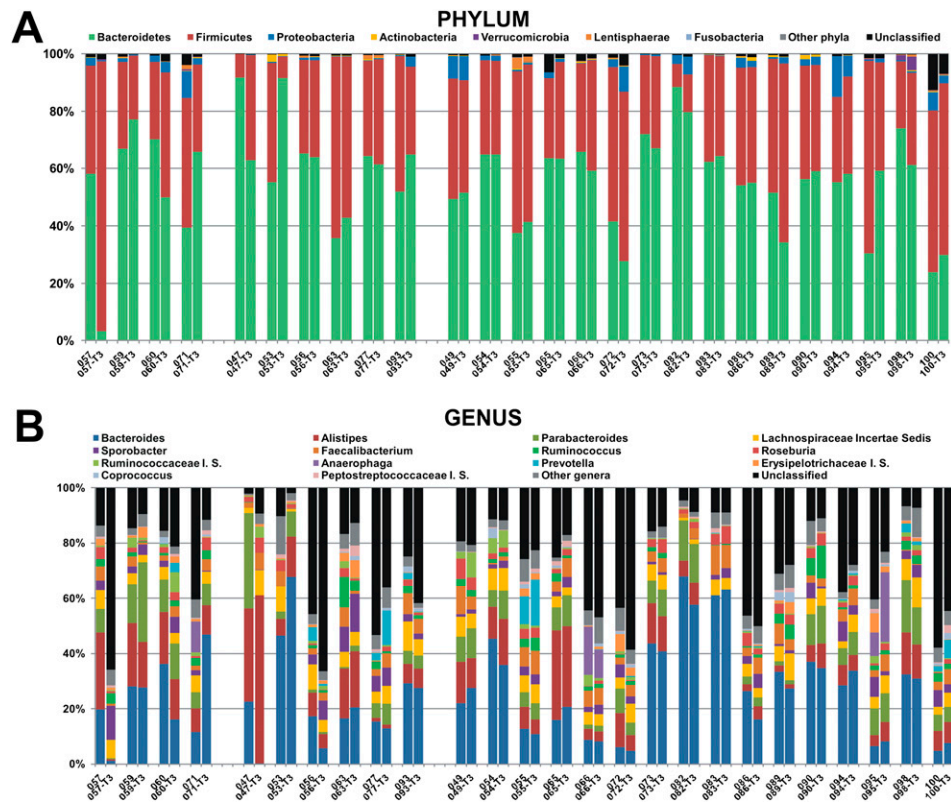

Fig. S6. Variation in the microbiota between time-0 and time 3-mo samples from 26 subjects: phylum assignments (A) and genus assignments (B). The first of the three sections in both panels contains paired samples that were not closest neighbors in either the unweighted UniFrac tree or the weighted tree. The second section contains samples that only colocalized in the unweighted tree. The third section contains samples that colocalized in both trees.



**Table S1. Distribution of 161 T0 and 26 T3 study participants by antibiotic use and age**

|                                         | Age (y)   |                         |                  |
|-----------------------------------------|-----------|-------------------------|------------------|
|                                         | Mean (SD) | Median (quartiles 1, 3) | Range (min, max) |
| All T0 subjects (n = 161)               | 78 (7)    | 78 (72, 84)             | 65, 96           |
| T0 subjects – antibiotic users (n = 43) | 81 (7)    | 81 (81, 85)             | 68, 96           |
| T0 subjects – antibiotic-free (n = 118) | 77 (7)    | 77 (72, 84)             | 65, 95           |
| All T3 subjects (n = 26)                | 73 (7)    | 72 (67, 77)             | 65, 88           |
| T3 subjects – antibiotic users (n = 5)  | 71 (5)    | 68 (67, 75)             | 67, 78           |
| T3 subjects – antibiotic-free (n = 21)  | 73 (7)    | 72 (67, 77)             | 65, 88           |

**Table S2. Core microbiota identified in the ELDERMET study and in healthy adults from four previously published studies**

|                         | N   | Age<br>(mean ±<br>SD years)                                | Total<br>number<br>of V4<br>sequences | Number of<br>unique<br>sequences<br>in core | Total number of<br>unique<br>sequences | Subject<br>specificity* | Core<br>proportion:<br>number of<br>unique<br>sequences | Sum of total<br>number<br>of unique<br>sequences | Core proportion:<br>sum of total<br>number of<br>unique sequences |
|-------------------------|-----|------------------------------------------------------------|---------------------------------------|---------------------------------------------|----------------------------------------|-------------------------|---------------------------------------------------------|--------------------------------------------------|-------------------------------------------------------------------|
| ELDERMET                | 118 | 77.3 ± 7.2                                                 | 3,981,241                             | 406                                         | 1,078,207                              | 85.8%                   | 0.04%                                                   | 1,581,571                                        | 1.8%                                                              |
| ELDERMET<br>controls    | 9   | 35.0 ± 6                                                   | 358,096                               | 2,101                                       | 125,616                                | 91.4%                   | 1.7%                                                    | 149,993                                          | 9.3%                                                              |
| Tap et al. (1)          | 17  | 37.0 ± 7.2                                                 | 10,364                                | 56                                          | 2,781                                  | 85.9%                   | 2.0%                                                    | 4,053                                            | 15.6%                                                             |
| Turnbaugh<br>et al. (2) | 30  | 20 twins<br>(21–32 y)<br>and their<br>mothers <sup>†</sup> | 7,664                                 | 24                                          | 2,271                                  | 87.1%                   | 1.1%                                                    | 3,486                                            | 13.7%                                                             |
| Zhang<br>et al. (3)     | 6   | 36.2 ± 5.8                                                 | 869                                   | 18                                          | 345                                    | 83.8%                   | 5.2%                                                    | 429                                              | 14.9%                                                             |
| Li et al. (4)           | 5   | 38.2 ± 17.4                                                | 4,693                                 | 64                                          | 917                                    | 84.1%                   | 7.0%                                                    | 1,171                                            | 20.2%                                                             |

\*Proportion of unique sequences present in only one subject.

<sup>†</sup>Subject ages not published.

1. Tap J, et al. (2009) Towards the human intestinal microbiota phylogenetic core. *Environ Microbiol* 11:2574–2584.
2. Turnbaugh PJ, et al. (2009) A core gut microbiome in obese and lean twins. *Nature* 457:480–484.
3. Zhang H, et al. (2009) Human gut microbiota in obesity and after gastric bypass. *Proc Natl Acad Sci USA* 106:2365–2370.
4. Li M, et al. (2008) Symbiotic gut microbes modulate human metabolic phenotypes. *Proc Natl Acad Sci USA* 105:2117–2122.



**Table S3. Breakdown of phylogenetic classifications and top BLAST hits in the RDP database for unique sequences specific to the elderly subjects in the ELDERMET study compared with core microbiota from younger subjects in this as well as the four published studies**

| Phylum               | Class                  | Genus                                       | <i>Clostridium</i> cluster | Best BLAST hit against species in RDP_v10.16 | Identity (%) | BLAST E-value |
|----------------------|------------------------|---------------------------------------------|----------------------------|----------------------------------------------|--------------|---------------|
| <i>Bacteroidetes</i> | <i>Bacteroidetes</i>   | <i>Rikenella</i>                            |                            | <i>Alistipes indistinctus</i>                | 100          | 3.0E-119      |
| <i>Bacteroidetes</i> | <i>Bacteroidetes</i>   | <i>Alistipes</i>                            |                            | <i>Alistipes finegoldii</i>                  | 100          | 2.0E-123      |
| <i>Bacteroidetes</i> | <i>Bacteroidetes</i>   | <i>Alistipes</i>                            |                            | <i>Alistipes massiliensis</i>                | 99.38        | 1.0E-84       |
| <i>Bacteroidetes</i> | <i>Bacteroidetes</i>   | <i>Alistipes</i>                            |                            | <i>Alistipes onderdonkii</i>                 | 100          | 4.0E-125      |
| <i>Bacteroidetes</i> | <i>Bacteroidetes</i>   | <i>Alistipes</i>                            |                            | <i>Alistipes putredinis</i>                  | 96.43        | 2.0E-108      |
| <i>Bacteroidetes</i> | <i>Bacteroidetes</i>   | <i>Alistipes</i>                            |                            | <i>Alistipes shahii</i>                      | 99.55        | 2.0E-123      |
| <i>Bacteroidetes</i> | <i>Bacteroidetes</i>   | <i>Bacteroides</i>                          |                            | <i>Bacteroides caccae</i>                    | 100          | 2.0E-123      |
| <i>Bacteroidetes</i> | <i>Bacteroidetes</i>   | <i>Bacteroides</i>                          |                            | <i>Bacteroides dorei</i>                     | 100          | 9.0E-123      |
| <i>Bacteroidetes</i> | <i>Bacteroidetes</i>   | <i>Bacteroides</i>                          |                            | <i>Bacteroides fragilis</i>                  | 100          | 9.0E-123      |
| <i>Bacteroidetes</i> | <i>Bacteroidetes</i>   | <i>Bacteroides</i>                          |                            | <i>Bacteroides ovatus</i>                    | 100          | 2.0E-123      |
| <i>Bacteroidetes</i> | <i>Bacteroidetes</i>   | <i>Bacteroides</i>                          |                            | <i>Bacteroides thetaiotaomicron</i>          | 100          | 2.0E-123      |
| <i>Bacteroidetes</i> | <i>Bacteroidetes</i>   | <i>Bacteroides</i>                          |                            | <i>Bacteroides uniformis</i>                 | 100          | 4.0E-125      |
| <i>Bacteroidetes</i> | <i>Bacteroidetes</i>   | <i>Bacteroides</i>                          |                            | <i>Bacteroides vulgatus</i>                  | 100          | 2.0E-123      |
| <i>Bacteroidetes</i> | <i>Bacteroidetes</i>   | <i>Bacteroides</i>                          |                            | <i>Bacteroides xylanisolvens</i>             | 100          | 2.0E-123      |
| <i>Bacteroidetes</i> | <i>Bacteroidetes</i>   | <i>Bacteroides</i>                          |                            | <i>Odoribacter splanchnicus</i>              | 99.54        | 2.0E-120      |
| <i>Bacteroidetes</i> | <i>Bacteroidetes</i>   | <i>Parabacteroides</i>                      |                            | <i>Parabacteroides distasonis</i>            | 100          | 3.0E-113      |
| <i>Bacteroidetes</i> | <i>Bacteroidetes</i>   | <i>Parabacteroides</i>                      |                            | <i>Parabacteroides merdae</i>                | 100          | 2.0E-123      |
| <i>Firmicutes</i>    | <i>Clostridia</i>      | <i>Anaerostipes</i>                         |                            | <i>Anaerosporeobacter mobilis</i>            | 94.98        | 7.0E-96       |
| <i>Firmicutes</i>    | <i>Clostridia</i>      | <i>Lachnospiraceae Incertae Sedis</i>       | XIVa                       | <i>Bacteroides xylanolyticus</i>             | 98.16        | 9.0E-123      |
| <i>Firmicutes</i>    | <i>Clostridia</i>      | <i>Lachnospiraceae Incertae Sedis</i>       | XIVa                       | <i>Blautia luti</i>                          | 99.55        | 7.0E-102      |
| <i>Firmicutes</i>    | <i>Clostridia</i>      | <i>Lachnospiraceae Incertae Sedis</i>       | XIVa                       | <i>Blautia schinkii</i>                      | 95.93        | 1.0E-81       |
| <i>Firmicutes</i>    | <i>Clostridia</i>      | <i>Peptostreptococcaceae Incertae Sedis</i> | XI                         | <i>Clostridium bartlettii</i>                | 100          | 2.0E-92       |
| <i>Firmicutes</i>    | <i>Clostridia</i>      | <i>Lachnospiraceae Incertae Sedis</i>       | XIVa                       | <i>Clostridium clostridioforme</i>           | 97.7         | 3.0E-113      |
| <i>Firmicutes</i>    | <i>Erysipelotrichi</i> | <i>Catenibacterium</i>                      | XVIII                      | <i>Clostridium cocleatum</i>                 | 92.24        | 1.0E-81       |
| <i>Firmicutes</i>    | <i>Clostridia</i>      | <i>Lachnospiraceae Incertae Sedis</i>       | XIVa                       | <i>Clostridium indolis</i>                   | 94.47        | 9.0E-123      |
| <i>Firmicutes</i>    | <i>Clostridia</i>      | <i>Peptostreptococcaceae Incertae Sedis</i> | XI                         | <i>Clostridium ruminantium</i>               | 98.61        | 2.0E-113      |
| <i>Firmicutes</i>    | <i>Clostridia</i>      | <i>Coprococcus</i>                          |                            | <i>Coprococcus catus</i>                     | 100          | 2.0E-120      |
| <i>Firmicutes</i>    | <i>Clostridia</i>      | <i>Dorea</i>                                | XIVa                       | <i>Coprococcus comes</i>                     | 100          | 9.0E-123      |
| <i>Firmicutes</i>    | <i>Clostridia</i>      | <i>Dorea</i>                                | XIVa                       | <i>Dorea longicatena</i>                     | 99.55        | 2.0E-123      |
| <i>Firmicutes</i>    | <i>Clostridia</i>      | <i>Lachnospiraceae Incertae Sedis</i>       | XIVa                       | <i>Eubacterium eligens</i>                   | 93.55        | 2.0E-123      |
| <i>Firmicutes</i>    | <i>Clostridia</i>      | <i>Papillibacter</i>                        | XIVa                       | <i>Eubacterium hallii</i>                    | 98.18        | 2.0E-123      |
| <i>Firmicutes</i>    | <i>Clostridia</i>      | <i>Roseburia</i>                            | XIVa                       | <i>Eubacterium rectale</i>                   | 100          | 2.0E-120      |
| <i>Firmicutes</i>    | <i>Clostridia</i>      | <i>Ruminococcaceae Incertae Sedis</i>       | IV                         | <i>Eubacterium siraeum</i>                   | 100          | 2.0E-89       |

Table S3. Cont.

| Phylum                | Class              | Genus                                 | <i>Clostridium</i> cluster | Best BLAST hit against species in RDP_v10.16 | Identity (%) | BLAST E-value |
|-----------------------|--------------------|---------------------------------------|----------------------------|----------------------------------------------|--------------|---------------|
| <i>Firmicutes</i>     | Clostridia         | <i>Faecalibacterium</i>               | IV                         | <i>Faecalibacterium prausnitzii</i>          | 100          | 2.0E-123      |
| <i>Firmicutes</i>     | Clostridia         | <i>Sporobacter</i>                    | IV                         | <i>Oscillospira guilliermondii</i>           | 94.66        | 9.0E-123      |
| <i>Firmicutes</i>     | Clostridia         | <i>Roseburia</i>                      | XIVa                       | <i>Roseburia faecis</i>                      | 100          | 4.0E-125      |
| <i>Firmicutes</i>     | Clostridia         | <i>Roseburia</i>                      | XIVa                       | <i>Roseburia hominis</i>                     | 100          | 3.0E-119      |
| <i>Firmicutes</i>     | Clostridia         | <i>Roseburia</i>                      | XIVa                       | <i>Roseburia intestinalis</i>                | 100          | 2.0E-123      |
| <i>Firmicutes</i>     | Clostridia         | <i>Roseburia</i>                      | XIVa                       | <i>Roseburia inulinivorans</i>               | 100          | 6.0E-121      |
| <i>Firmicutes</i>     | Clostridia         | <i>Ruminococcus</i>                   | IV                         | <i>Ruminococcus bromii</i>                   | 100          | 6.0E-121      |
| <i>Firmicutes</i>     | Clostridia         | <i>Lachnospiraceae Incertae Sedis</i> | XIVa                       | <i>Ruminococcus lactaris</i>                 | 97.24        | 2.0E-123      |
| <i>Firmicutes</i>     | Clostridia         | <i>Lachnospiraceae Incertae Sedis</i> | XIVa                       | <i>Ruminococcus obeum</i>                    | 100          | 2.0E-123      |
| <i>Firmicutes</i>     | Clostridia         | <i>Lachnospiraceae Incertae Sedis</i> | XIVa                       | <i>Ruminococcus torques</i>                  | 99.09        | 1.0E-106      |
| <i>Firmicutes</i>     | Clostridia         | <i>Sporobacter</i>                    |                            | <i>Sporobacter termitidis</i>                | 93.63        | 2.0E-123      |
| <i>Proteobacteria</i> | Betaproteobacteria | <i>Thiobacter</i>                     |                            | <i>Parasutterella excrementihominis</i>      | 100          | 1.0E-118      |

Table S4. Breakdown of phylogenetic classifications and top BLAST hits in the RDP database for unique sequences specific to younger subjects compared with core microbiota from younger subjects in this as well as the four published studies

| Phylum               | Class           | Genus                                 | <i>Clostridium</i> cluster | Best BLAST hit against species in RDP_v10.16 | Identity (%) | BLAST E-value |
|----------------------|-----------------|---------------------------------------|----------------------------|----------------------------------------------|--------------|---------------|
| <i>Bacteroidetes</i> | Bacteroidetes   | <i>Bacteroides</i>                    |                            | <i>Bacteroides vulgatus</i>                  | 100          | 4.0E-125      |
| <i>Firmicutes</i>    | Clostridia      | <i>Anaerostipes</i>                   |                            | <i>Anaerosporeobacter mobilis</i>            | 95.07        | 3.0E-98       |
| <i>Firmicutes</i>    | Clostridia      | <i>Lachnospiraceae Incertae Sedis</i> | XIVa                       | <i>Blautia luti</i>                          | 99.56        | 1.0E-121      |
| <i>Firmicutes</i>    | Clostridia      | <i>Lachnospiraceae Incertae Sedis</i> | XIVa                       | <i>Blautia schinkii</i>                      | 95.98        | 1.0E-103      |
| <i>Firmicutes</i>    | Clostridia      | <i>Lachnospiraceae Incertae Sedis</i> | XIVa                       | <i>Clostridium clostridioforme</i>           | 97.77        | 1.0E-103      |
| <i>Firmicutes</i>    | Erysipelotrichi | <i>Catenibacterium</i>                | XVIII                      | <i>Clostridium cocleatum</i>                 | 92.38        | 6.0E-84       |
| <i>Firmicutes</i>    | Clostridia      | <i>Sporobacter</i>                    | III                        | <i>Clostridium termitidis</i>                | 98.01        | 4.0E-125      |
| <i>Firmicutes</i>    | Clostridia      | <i>Dorea</i>                          |                            | <i>Coprococcus comes</i>                     | 100          | 4.0E-125      |
| <i>Firmicutes</i>    | Clostridia      | <i>Dorea</i>                          | XIVa                       | <i>Dorea formicigenerans</i>                 | 99.55        | 2.0E-123      |
| <i>Firmicutes</i>    | Clostridia      | <i>Dorea</i>                          | XIVa                       | <i>Dorea longicatena</i>                     | 99.56        | 6.0E-121      |
| <i>Firmicutes</i>    | Clostridia      | <i>Lachnospiraceae Incertae Sedis</i> | XIVa                       | <i>Eubacterium hallii</i>                    | 98.21        | 9.0E-120      |
| <i>Firmicutes</i>    | Clostridia      | <i>Roseburia</i>                      | XIVa                       | <i>Eubacterium rectale</i>                   | 100          | 4.0E-125      |
| <i>Firmicutes</i>    | Clostridia      | <i>Subdoligranulum</i>                | IV                         | <i>Faecalibacterium prausnitzii</i>          | 95.67        | 4.0E-94       |
| <i>Firmicutes</i>    | Clostridia      | <i>Lachnospiraceae Incertae Sedis</i> | XIVa                       | <i>Ruminococcus lactaris</i>                 | 97.32        | 8.0E-111      |
| <i>Firmicutes</i>    | Clostridia      | <i>Lachnospiraceae Incertae Sedis</i> | XIVa                       | <i>Ruminococcus obeum</i>                    | 100          | 4.0E-125      |
